# Supplementary material for: Increased Presence of Circulating Cell-Free, Fragmented, Host DNA in Pigs Infected with Virulent African Swine Fever Virus
Source: MDPI journal article supplement (doi:10.3390/v15102133), 2023-10-21
Supplement: s1 [file s1]

## Supplementary Figure S1.

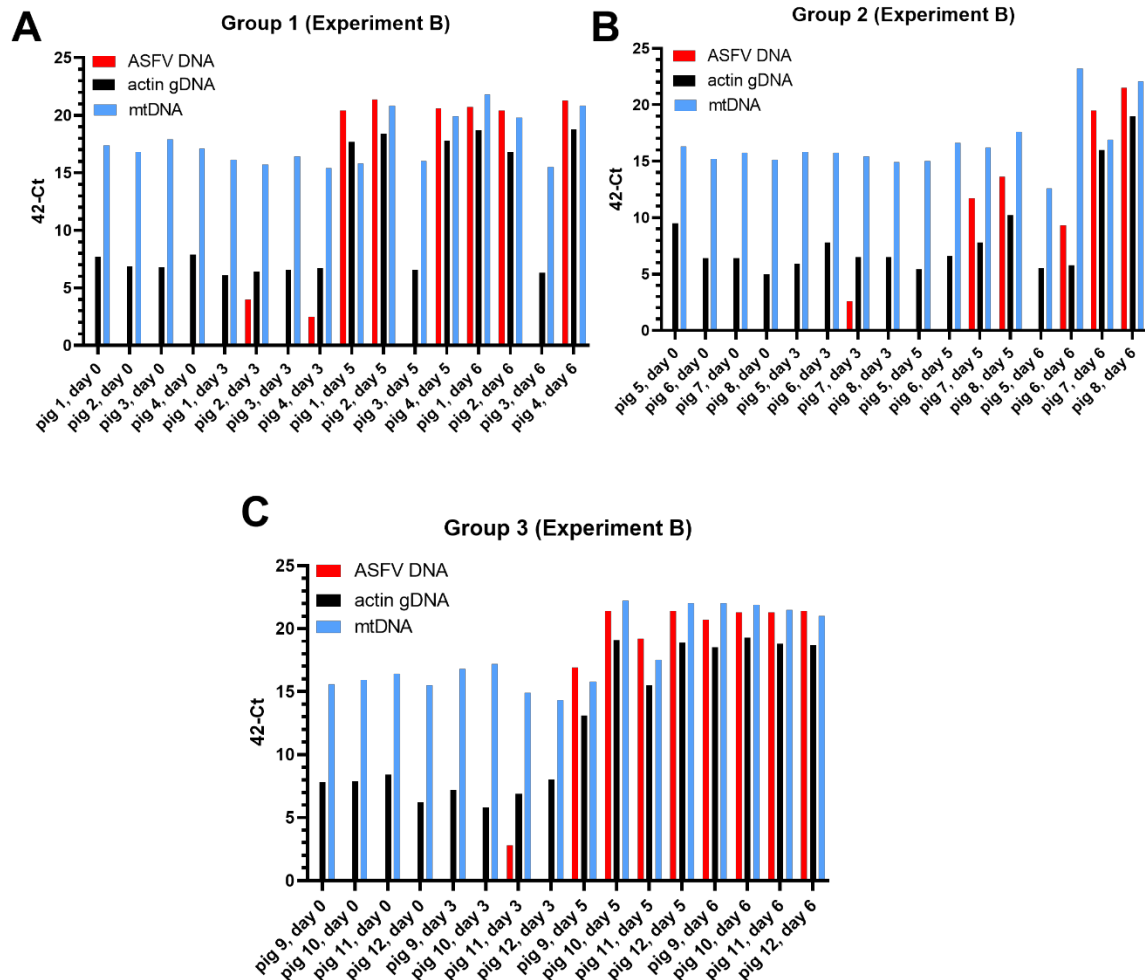

**Detection of ASFV DNA,  $\beta$ -actin gDNA and mtDNA in sera from ASFV-inoculated pigs in Experiment B.** Nucleic acids were extracted from serum samples collected on the indicated days from three groups of 4 pigs, (Groups 1 (panel A), Group 2 (panel B) and Group 3 (panel C)) as described in Figure 3. The samples were assayed by qPCR for the presence of ASFV DNA, the cellular  $\beta$ -actin gene (gDNA) and mtDNA as indicated. Results are presented as 42-Ct values. Absolute genome copy numbers derived from these data, using standard curves, are presented in Figure 3A, B and C. As indicated in Figure 3, pigs 3 and 5 showed no indications of becoming infected by ASFV following their inoculation with the virus.
